# Supplementary material
Source: publisher figshare collection journal article supplement (https://sage.figshare.com/ndownloader/files/14033354)
Supplement: Supplementary file 1 [file 14033354]

**Supplemental Appendix Table 1. Demographic characteristics of men age 50 and older in select geographical U.S. regions, combined 2014 -2016 BRFSS.**

**Supplemental Appendix Table 2. Demographic characteristics of women adults age 50 and older in select geographical U.S. regions, combined 2014 -2016 BRFSS.**
